# Supplementary material for: RPE65-associated inherited retinal diseases: consensus recommendations for eligibility to gene therapy
Source: PubMed Central journal article supplement (PMC8176684; doi:10.1186/s13023-021-01868-4), 2021-06-04
Supplement: 13023_2021_1868_MOESM2_ESM.pdf [file 13023_2021_1868_MOESM2_ESM.pdf]

**Table S2. Viable retinal cells: structure and function.** Level of agreement after completion of Rounds 1 and 2. A cut-off of 70 (Agree and Strongly agree on the 5-point Likert scale) was defined as consensus. Statements not included in a survey Round are marked with "-" in the relevant column. Items where the general mean of the sample deviated significantly from the responses stratified by medical speciality are marked with an asterisk.

| No.  | Statement                                                                                                                    | Degree of consensus, % |              |
|------|------------------------------------------------------------------------------------------------------------------------------|------------------------|--------------|
|      |                                                                                                                              | First round            | Second round |
| 13   | Residual viable retinal cells and their functioning should be assessed with:                                                 |                        |              |
| 13.1 | Optical Coherence Tomography (OCT)                                                                                           | 78.6                   | 97.1         |
| 13.2 | Visual acuity                                                                                                                | 57.1                   | 76.5*        |
| 13.3 | Goldmann visual field (GVF)                                                                                                  | 51.9                   | 73.5*        |
| 13.4 | Full-field electroretinogram (ERG)                                                                                           | 71.4                   | 85.7         |
| 13.5 | Fundus autofluorescence (FAF)                                                                                                | 60.7                   | 90.9         |
| 13.6 | Microperimetry (MP)                                                                                                          | 60.7                   | 79.4         |
| 14   | The most appropriate approach to assess viable cells is to perform the clinical tests separately according to this sequence: | –                      |              |
| 14.1 | First level: OCT                                                                                                             | –                      | 75.8         |
| 14.2 | Second level: standard ophthalmological examinations including visual acuity, anterior & posterior segment by microscopy     | –                      | 63.6*        |
| 14.3 | Third level: GVP, MP, colour picture, FAF, ERG                                                                               | –                      | 72.7         |
| 15   | OCT is the most suitable but not the only test for measuring the remaining vital retinal cells                               | 75.0                   | 79.4         |
