# Supplementary material for: RPE65-associated inherited retinal diseases: consensus recommendations for eligibility to gene therapy
Source: PubMed Central journal article supplement (PMC8176684; doi:10.1186/s13023-021-01868-4), 2021-06-04
Supplement: 13023_2021_1868_MOESM4_ESM.pdf [file 13023_2021_1868_MOESM4_ESM.pdf]

**Table S4. Patient eligibility and prioritisation.** Level of agreement after completion of Rounds 1 and 2. A cut-off of 70 (Agree and Strongly agree on the 5-point Likert scale) was defined as consensus. Statements not included in a survey Round are marked with "-" in the relevant column. Items where the general mean of the sample deviated significantly from the responses stratified by medical speciality are marked with an asterisk.

| No.  | Statement                                                                                                                                                                                               | Degree of consensus, % |              |
|------|---------------------------------------------------------------------------------------------------------------------------------------------------------------------------------------------------------|------------------------|--------------|
|      |                                                                                                                                                                                                         | First round            | Second round |
| 33   | Progression alone is not a prognostic criterion                                                                                                                                                         | 48.3                   | –            |
| 34   | Disease progression rate for RPE65-associated inherited retinal disease can be defined by one or more parameters including:                                                                             | –                      |              |
| 34.1 | Visual field loss                                                                                                                                                                                       | –                      | 97.2         |
| 34.2 | Visual acuity deterioration                                                                                                                                                                             | –                      | 94.4         |
| 34.3 | Viable retinal cells by OCT evaluation                                                                                                                                                                  | –                      | 88.9         |
| 35   | The following criteria are useful for “prioritising” eligible patients to receive treatment with Voretigene Neparvovec                                                                                  |                        |              |
| 35.1 | Age                                                                                                                                                                                                     | 82.8                   | 94.6         |
| 35.2 | Disease progression rate                                                                                                                                                                                | 79.3                   | 83.8         |
| 35.3 | Visual acuity status                                                                                                                                                                                    | 75.9                   | 66.7         |
| 35.4 | Amount of viable retinal cells                                                                                                                                                                          | 89.7                   | 94.6         |
| 35.5 | Confirmed <i>RPE65</i> mutations pathogenicity (category 4 and 5, likely pathogenic and pathogenic)                                                                                                     | 96.6                   | 94.4         |
| 36   | Other aspects to consider in prioritisation are:                                                                                                                                                        | –                      |              |
| 36.1 | Psychological assessment and the patient's attitude toward treatment                                                                                                                                    | –                      | 86.5         |
| 36.2 | Early treatment for paediatric patients                                                                                                                                                                 | –                      | 97.3         |
| 36.3 | Early treatment for patients with good visual acuity (higher than 05 LogMar, 032 decimal) to prevent progression                                                                                        | –                      | 77.1         |
| 36.4 | Early treatment for patients with low visual acuity (05 LogMar, 032 decimal or worse) to preserve the remaining vision                                                                                  | –                      | 77.1         |
| 36.5 | Handheld instruments use (OCT, retinal imaging, ERG) in case of children less than 3 years old                                                                                                          | –                      | 73.5         |
| 36.6 | Patient’s compliance with follow-up assessments post-treatment                                                                                                                                          | –                      | 88.9         |
| 37   | A paediatric patient can be a candidate for gene therapy with Voretigene Neparvovec starting from the age of 3 years                                                                                    | 72.4                   | 66.7         |
| 38   | It is important to give high priority to the treatment of paediatric patients, in order to provide them with the opportunity for maintaining a better visual acuity and enjoying a normal social growth | 89.3                   | 89.2         |
| 39   | Age is not a criterion for exclusion from gene therapy in patients with age > 3 years                                                                                                                   | 89.7                   | 86.5         |
