# Supplementary material for: RPE65-associated inherited retinal diseases: consensus recommendations for eligibility to gene therapy
Source: PubMed Central journal article supplement (PMC8176684; doi:10.1186/s13023-021-01868-4), 2021-06-04
Supplement: 13023_2021_1868_MOESM5_ESM.pdf [file 13023_2021_1868_MOESM5_ESM.pdf]

**Table S5. Assessment of surgical strategy.** Level of agreement after completion of Rounds 1 and 2. A cut-off of 70 (Agree and Strongly agree on the 5-point Likert scale) was defined as consensus. Statements not included in a survey Round are marked with "-" in the relevant column. Items where the general mean of the sample deviated significantly from the responses stratified by medical speciality are marked with an asterisk.

| No.  | Statement                                                                                                                                                                                  | Degree of consensus, % |              |
|------|--------------------------------------------------------------------------------------------------------------------------------------------------------------------------------------------|------------------------|--------------|
|      |                                                                                                                                                                                            | First round            | Second round |
| 40   | Patients with suspected RPE65-associated IRD must be referred to a clinical centre specialised in inherited retinal diseases                                                               | 100.0                  | 100.0        |
| 41   | The vitreoretinal surgeon who performs the subretinal injection must be affiliated to an Inherited Retinal Disease Centre certified for the use of gene therapy with Voretigene Neparvovec | 86.2                   | 91.9         |
| 42   | The vitreoretinal surgeons must have surgical experience with patients with inherited retinal diseases                                                                                     | 86.2                   | –            |
| 42   | The vitreoretinal surgeons must have surgical experience with paediatric and adult patients with inherited retinal diseases                                                                | –                      | 89.2         |
| 43   | Inherited Retinal Diseases retina specialist must have in-depth discussions with the certified vitreoretinal surgeon to:                                                                   |                        |              |
| 43.1 | Confirm the best surgery strategy for each patient candidate to treatment with Voretigene Neparvovec                                                                                       | 92.6                   | 97.1         |
| 43.2 | Assess vitrectomy surgery and subretinal injection risks                                                                                                                                   | 85.7                   | 91.7         |
| 44   | The following topics must be discussed with the certified surgeon to confirm patient eligibility for surgery and to assess surgery risks:                                                  |                        |              |
| 44.1 | Patient age                                                                                                                                                                                | 75.0                   | 83.8         |
| 44.2 | Retinal thickness                                                                                                                                                                          | 82.1                   | 94.6         |
| 44.3 | Other eye disorders                                                                                                                                                                        | 82.1                   | 89.2*        |
| 44.4 | Injection site                                                                                                                                                                             | 71.4                   | 89.2         |
| 45   | What other topics must be discussed with the certified surgeon to confirm patient eligibility for surgery and to assess surgery risks:                                                     | –                      |              |
| 45.1 | A paediatric hospital setting for children-centred care (3-6 years old) delivery and proper management of paediatric anaesthesiology procedures                                            | –                      | 91.2         |
| 45.2 | Presence of cataract as an exclusion criteria                                                                                                                                              | –                      | 42.4*        |
| 45.3 | Eligibility for general anaesthesia                                                                                                                                                        | –                      | 83.3         |
| 45.4 | Vitrectomy technique: three-port posterior vitrectomy 25G and mandatory posterior vitreous detachment                                                                                      | –                      | 63.3*        |
| 45.5 | Vitrectomy technique: possibility to use vitreous staining such as triamcinolone                                                                                                           | –                      | 58.6*        |
| 45.6 | Evaluate surgery risk/treatment benefit ratio                                                                                                                                              | –                      | 88.2         |
| 45.7 | Anamnesis: clinical history, genetic diagnosis, expectations of the patient regarding clinical outcomes                                                                                    | –                      | 90.9         |
